# Supplementary material
Source: ML conference proceedings conference paper supplement (https://openreview.net/forum?id=OJm3HZuj4r7)

Skiing ( $\gamma \approx 0.9997$ )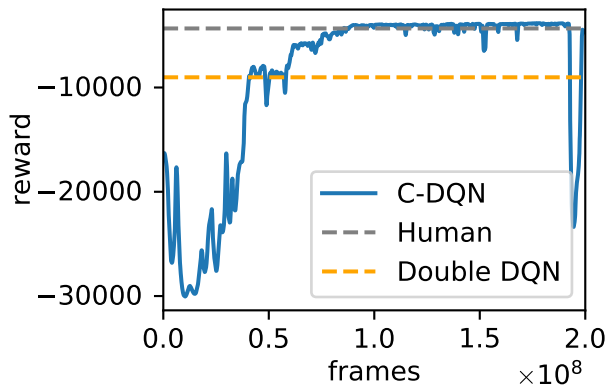Tennis ( $\gamma \approx 0.9972$ )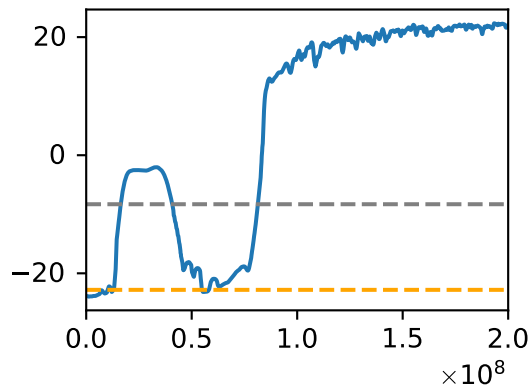Bowling ( $\gamma \approx 0.9995$ )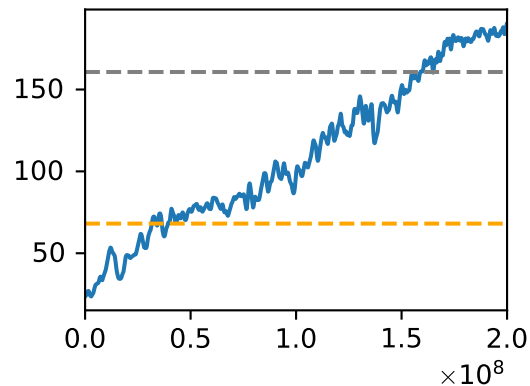SpaceInvaders ( $\gamma \approx 0.9969$ )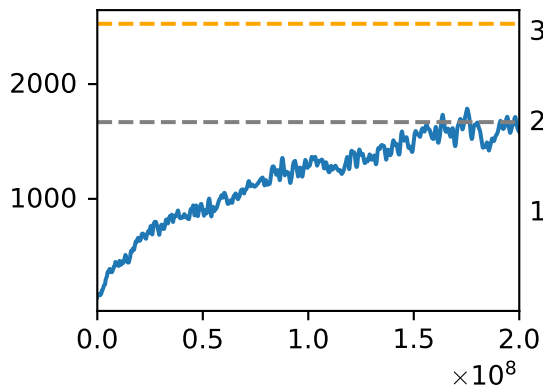Hero ( $\gamma \approx 0.9976$ )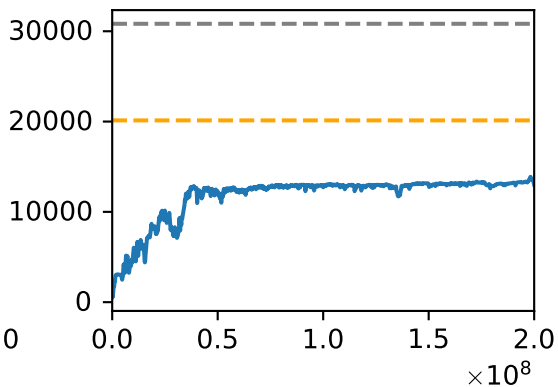MsPacman ( $\gamma \approx 0.9948$ )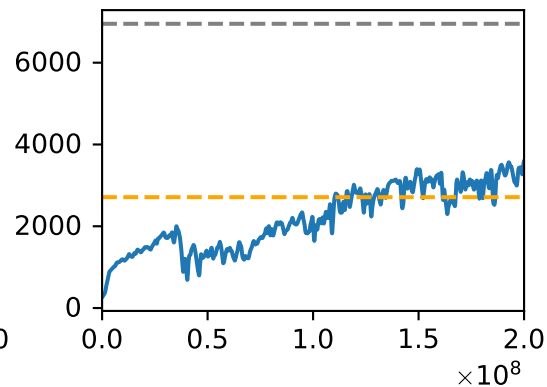

Supplement: supplementary_material [file attachment]
